# Supplementary material for: Cu(i)-Catalyzed amino-yne click polymerization
Source: Royal Society of Chemistry journal article supplement (doi:10.1039/c6py01501h), 2016-01-01
Supplement: c6py01501h1.pdf [file c6py01501h1.pdf]

## Electronic Supplementary Information (ESI)

# Cu(I)-Catalyzed Amino-Yne Click Polymerization

*Benzhao He,<sup>†</sup> Shijie Zhen,<sup>†</sup> Yongwei Wu,<sup>†</sup> Rongrong Hu,<sup>†</sup> Zujin Zhao,<sup>†</sup> Anjun Qin,<sup>\*,†</sup>*

*and Ben Zhong Tang<sup>\*,†,‡</sup>*

<sup>†</sup> Guangdong Innovative Research Team, State Key Laboratory of Luminescent Materials and Devices, South China University of Technology, Guangzhou 510640, China.

<sup>‡</sup> Department of Chemistry, Hong Kong Branch of Chinese National Engineering Research Center for Tissue Restoration and Reconstruction, The Hong Kong University of Science & Technology, Clear Water Bay, Kowloon, Hong Kong, China.

### Table of contents

|                                                                                                                                                                                             |    |
|---------------------------------------------------------------------------------------------------------------------------------------------------------------------------------------------|----|
| <b>Table S1.</b> Crystal data and structure refinement of monomer <b>1</b> .                                                                                                                | S2 |
| <b>Table S2.</b> Crystal data and structure refinement of model compound <b>4</b> .                                                                                                         | S3 |
| <b>Figure S1.</b> Single crystal structure (CCDC 1457164) of monomer <b>1</b> .                                                                                                             | S4 |
| <b>Figure S2.</b> TGA curves of <b>PIa-PId</b> recorded under nitrogen at a heating rate of 10 °C/min.                                                                                      | S4 |
| <b>Table S3.</b> The weight loss in the first decomposition stage.                                                                                                                          | S4 |
| <b>Figure S3.</b> <sup>1</sup> H NMR spectra of crude product of model reaction in dichloromethane- <i>d</i> <sub>2</sub> . The solvent peaks are marked with asterisks.                    | S5 |
| <b>Figure S4.</b> FT-IR spectra of (A) <b>PIb</b> , (B) <b>PIc</b> and (C) <b>PId</b> .                                                                                                     | S5 |
| <b>Figure S5.</b> <sup>1</sup> H NMR spectra of (A) <b>PIb</b> , (B) <b>PIc</b> and (C) <b>PId</b> in dichloromethane- <i>d</i> <sub>2</sub> . The solvent peaks are marked with asterisks. | S6 |
| <b>Figure S6.</b> <sup>13</sup> C NMR spectra of (A) <b>PIb</b> , (B) <b>PIc</b> and (C) <b>PId</b> in dichloromethane- <i>d</i> <sub>2</sub> . The                                         |    |

solvent peaks are marked with asterisks.

S7

**Table S1. Crystal data and structure refinement of monomer 1**

|                                   |                                                |                               |
|-----------------------------------|------------------------------------------------|-------------------------------|
| Empirical formula                 | C <sub>33</sub> H <sub>24</sub> O <sub>4</sub> |                               |
| Formula weight                    | 484.52                                         |                               |
| Temperature                       | 293 K                                          |                               |
| Wavelength                        | 0.71073 Å                                      |                               |
| Crystal system                    | triclinic                                      |                               |
| Space group                       | P-1                                            |                               |
| Unit cell dimensions              | $a = 8.8102(8)$ Å                              | $\alpha = 105.048(8)^\circ$ . |
|                                   | $b = 12.1290(11)$ Å                            | $\beta = 91.812(7)^\circ$ .   |
|                                   | $c = 13.7804(11)$ Å                            | $\gamma = 110.568(8)^\circ$ . |
| Volume                            | 1319.1(2) Å <sup>3</sup>                       |                               |
| Z                                 | 2                                              |                               |
| Density (calculated)              | 1.220 mg/m <sup>3</sup>                        |                               |
| Absorption coefficient            | 0.080 mm <sup>-1</sup>                         |                               |
| F(000)                            | 508                                            |                               |
| Crystal size                      | 0.45 × 0.36 × 0.28 mm <sup>3</sup>             |                               |
| Theta range for data collection   | 3.11 to 25.35°.                                |                               |
| Index ranges                      | -10 ≤ h ≤ 8, -14 ≤ k ≤ 13, -14 ≤ l ≤ 16        |                               |
| Reflections collections           | 8271                                           |                               |
| Independent reflections           | 4828 [R(int) = 0.0256]                         |                               |
| Completeness to theta = 66.50°    | 99.57%                                         |                               |
| Absorption correction             | Semi-empirical from equivalents                |                               |
| Max. and min. transmission        | 1.00000 and 0.88392                            |                               |
| Refinement method                 | Full-matrix least-squares on F <sup>2</sup>    |                               |
| Data / restraints / parameters    | 4828 / 0 / 337                                 |                               |
| Goodness-of-fit on F <sup>2</sup> | 1.019                                          |                               |
| Final R indices [I > 2σ(I)]       | R1 = 0.0520, wR2 = 0.1227                      |                               |
| R indices (all data)              | R1 = 0.0865, wR2 = 0.1478                      |                               |
| Largest diff. peak and hole       | 0.325 and -0.304 e.Å <sup>-3</sup>             |                               |

**Table S2. Crystal data and structure refinement of model compound 4.**

|                                   |                                             |                          |
|-----------------------------------|---------------------------------------------|--------------------------|
| Empirical formula                 | $C_{45}H_{38}N_2O_4$                        |                          |
| Formula weight                    | 670.77                                      |                          |
| Temperature                       | 293 K                                       |                          |
| Wavelength                        | 0.71073 Å                                   |                          |
| Crystal system                    | orthorhombic                                |                          |
| Space group                       | P b c n                                     |                          |
| Unit cell dimensions              | $a = 12.0454(6)$ Å                          | $\alpha = 90.00^\circ$ . |
|                                   | $b = 19.9342(12)$ Å                         | $\beta = 90.00^\circ$ .  |
|                                   | $c = 15.6271(7)$ Å                          | $\gamma = 90.00^\circ$ . |
| Volume                            | 3752.3(3) Å <sup>3</sup>                    |                          |
| Z                                 | 4                                           |                          |
| Density (calculated)              | 1.187 mg/m <sup>3</sup>                     |                          |
| Absorption coefficient            | 0.076 mm <sup>-1</sup>                      |                          |
| F(000)                            | 1416                                        |                          |
| Crystal size                      | 0.40 × 0.30 × 0.26 mm <sup>3</sup>          |                          |
| Theta range for data collection   | 2.96 to 25.35°.                             |                          |
| Index ranges                      | -14 ≤ h ≤ 12, -21 ≤ k ≤ 24, -18 ≤ l ≤ 17    |                          |
| Reflections collections           | 22198                                       |                          |
| Independent reflections           | 3433 [R(int) = 0.0473]                      |                          |
| Completeness to theta = 66.50°    | 99.65%                                      |                          |
| Absorption correction             | Semi-empirical from equivalents             |                          |
| Max. and min. transmission        | 1.00000 and 0.95672                         |                          |
| Refinement method                 | Full-matrix least-squares on F <sup>2</sup> |                          |
| Data / restraints / parameters    | 3433 / 0 / 232                              |                          |
| Goodness-of-fit on F <sup>2</sup> | 1.015                                       |                          |
| Final R indices [I > 2σ(I)]       | R1 = 0.0455, wR2 = 0.1089                   |                          |
| R indices (all data)              | R1 = 0.0777, wR2 = 0.1261                   |                          |
| Largest diff. peak and hole       | 0.154 and -0.129 e.Å <sup>-3</sup>          |                          |

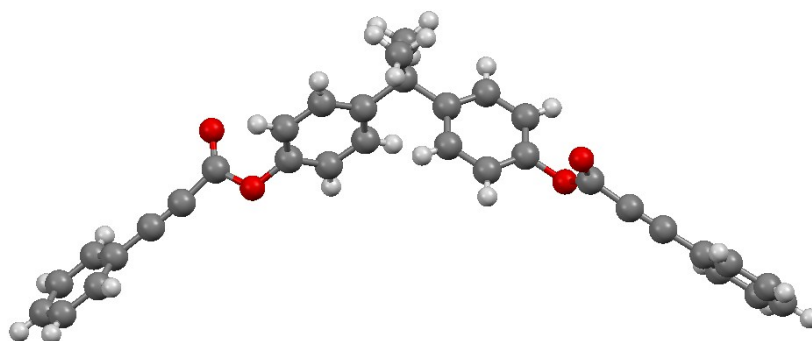

**Figure S1.** Single crystal structure (CCDC 1457164) of monomer **1**.

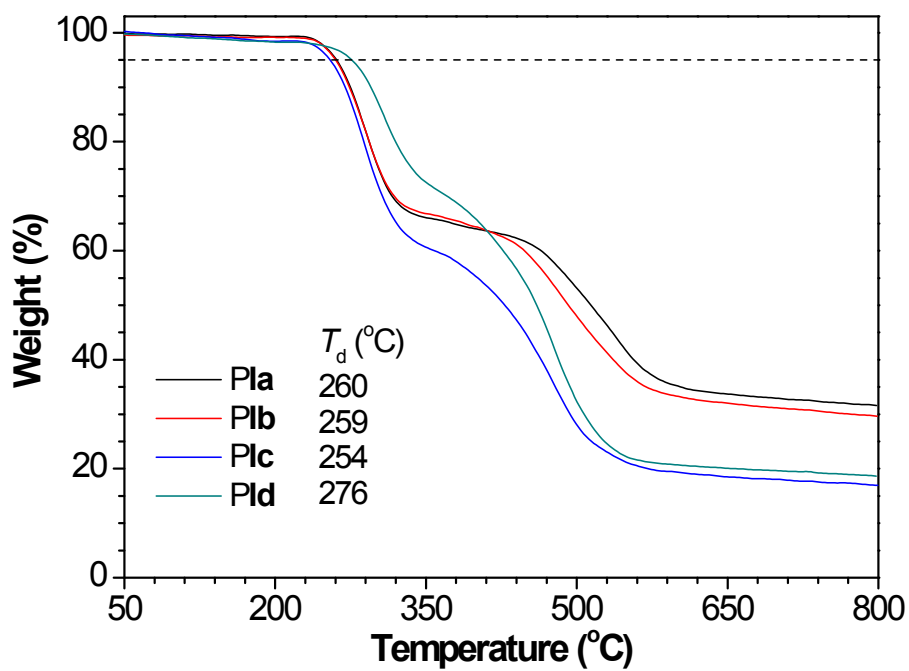

**Figure S2.** TGA curves of **PIa-PId** recorded under nitrogen at a heating rate of 10 °C/min.

**Table S3.** The weight loss in the first decomposition stage.

| polymers   | experimental values (%) | calculated values (%) |
|------------|-------------------------|-----------------------|
| <b>PIa</b> | 34.2                    | 33.1                  |
| <b>PIb</b> | 33.3                    | 33.0                  |
| <b>PIc</b> | 39.5                    | 38.0                  |

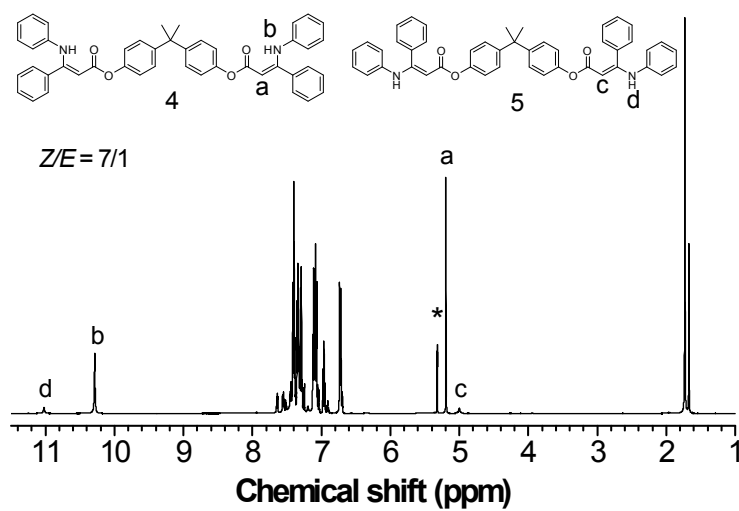

**Figure S3**  $^1\text{H}$  NMR spectra of crude product of model reaction in dichloromethane- $d_2$ . The solvent peaks are marked with asterisks.

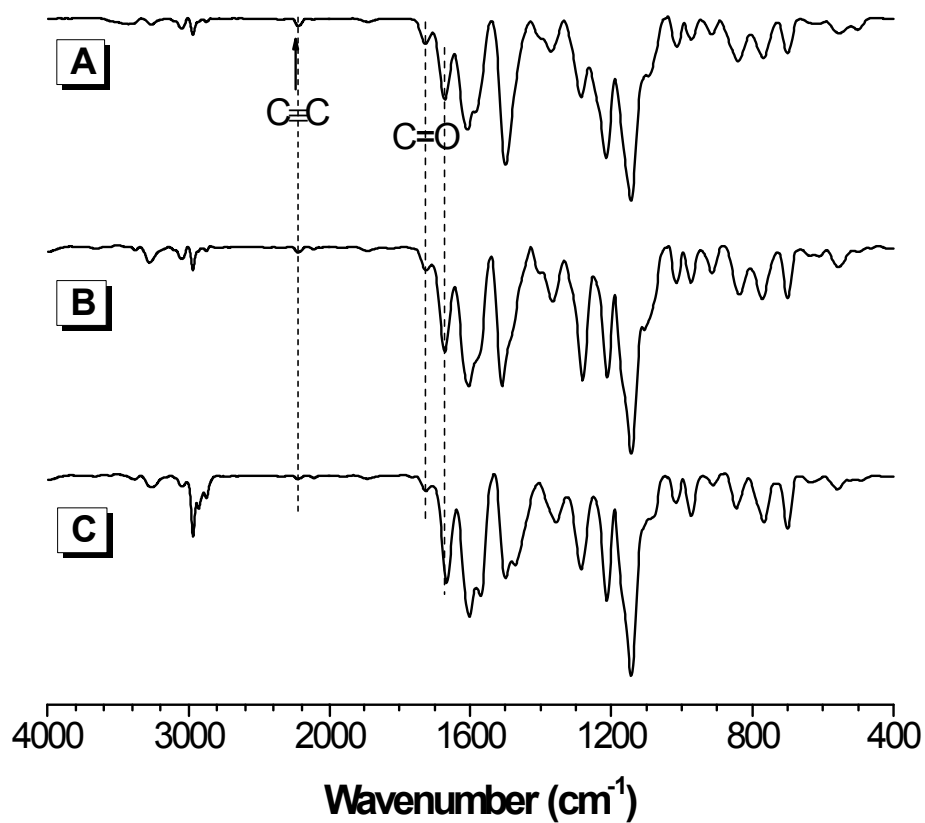

**Figure S4.** FT-IR spectra of (A) **PIb**, (B) **PIc** and (C) **PIId**.

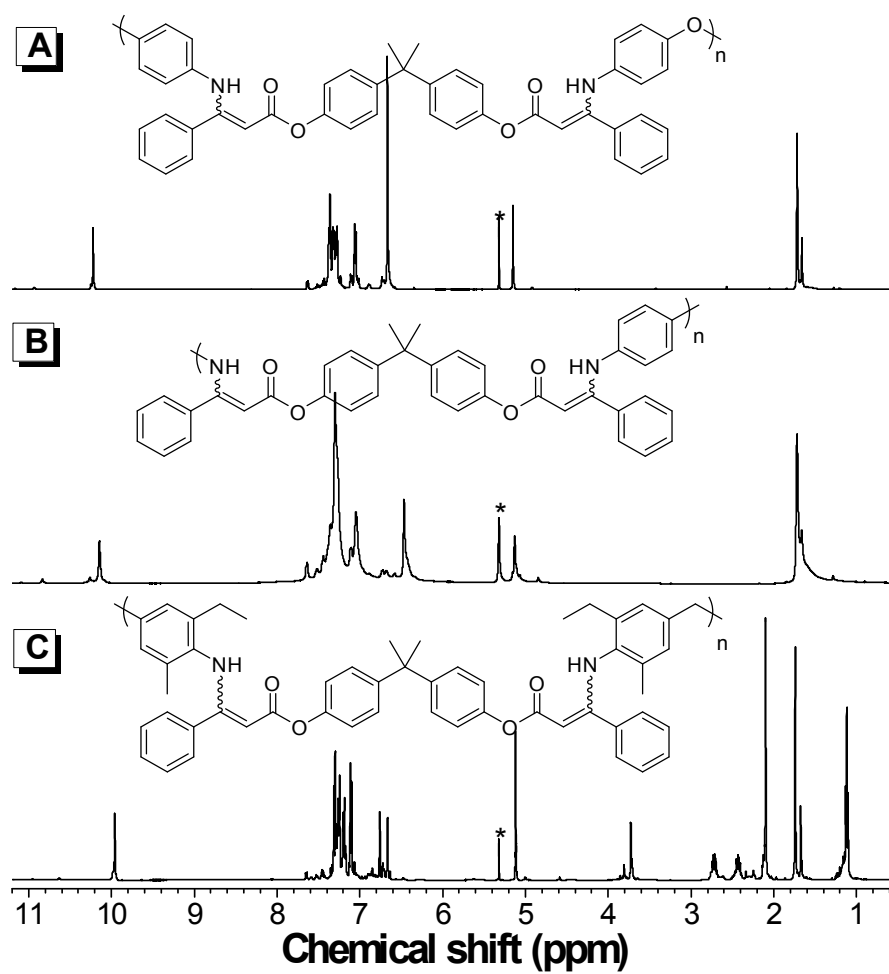

**Figure S5.**  $^1\text{H}$  NMR spectra of (A) **PIb**, (B) **PIc** and (C) **PIId** in dichloromethane- $d_2$ . The solvent peaks are marked with asterisks.

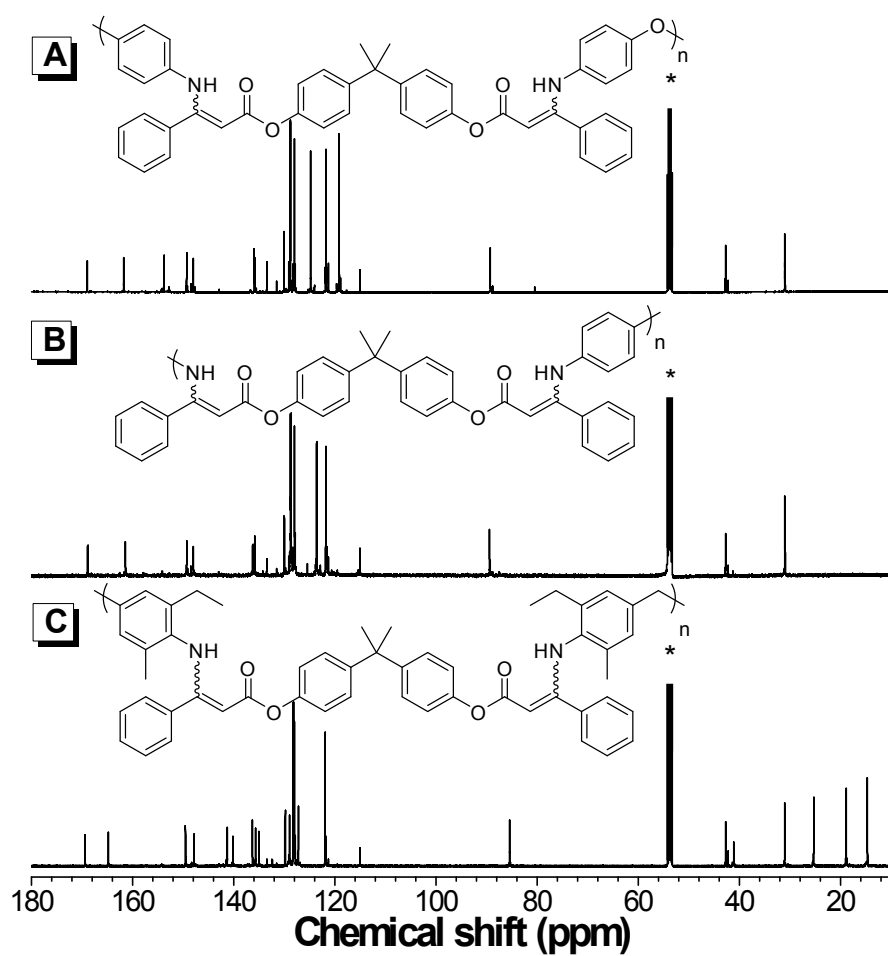

**Figure S6.**  $^{13}\text{C}$  NMR spectra of (A) PIb, (B) PIc and (C) PId in dichloromethane- $d_2$ . The solvent peaks are marked with asterisks.
